# Supplementary material for: Allogeneic Umbilical Cord Blood Infusion for Adults with Ischemic Stroke: Clinical Outcomes from a Phase I Safety Study
Source: PubMed Central journal article supplement — Stem Cells Transl Med. 2018 May 12;7(7):521–9. doi: 10.1002/sctm.18-0008 (PMC6052613; doi:10.1002/sctm.18-0008), 2018-05-12
Supplement: SCT3-7-521-s003.pdf [file SCT3-7-521-s003.pdf]

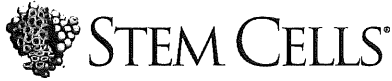

**POTENTIAL CONFLICT OF INTEREST AND FINANCIAL DISCLOSURE FORM – MEDICAL WRITER**

It is the policy of STEM CELLS® Journal to ensure balance, independence, objectivity, and scientific rigor in all of its educational activities through the disclosure of financial interests and other relationships.

**POLICY:** In accordance with Journal policy, all persons who affect the content of an article regarding the products or services of a commercial interest must disclose any financial relationships with that commercial interest occurring within the last 12 months. STEM CELLS® abides by a policy of anonymous peer review: any potential conflicts of interest are reviewed by the Editorial Board with the ad hoc assistance of external reviewers and are resolved prior to publication.

**DEFINING A CONFLICT OF INTEREST:** A conflict of interest exists when an individual has both a **financial relationship** with a commercial interest and **the opportunity to affect the content of an article** about the product or services of that commercial interest. STEM CELLS® has faith in the integrity of the individuals who present educational activities. However, to avoid the appearance of any conflict of interest, this form has been adopted to identify and resolve any potential conflicts of interest.

**CRITERIA FOR FINANCIAL DISCLOSURE:** A *commercial interest* is defined as any entity producing, marketing, re-selling, or distributing health care goods or services consumed by, or used on, patients. Relationships with governmental agencies (e.g., the National Institutes of Health) do not have to be disclosed. Principal investigators must report research funding relationships under "Research" even if those funds were disbursed to an institution. In addition to your own disclosure, you must disclose financial relationships your spouse or life partner has with applicable commercial interests. A spouse or life partner's disclosure information should be included with your disclosure information in the table below (and marked accordingly).

**Manuscript Title:** SCTM-18-0008 - Allogeneic Umbilical Cord Blood Infusion for Adults with Ischemic Stroke (CoBIS): Clinical

**Name of Discloser:** Jessica Pritchard, Ph.D.

**Manuscript Contributions (check all that apply):**

| ICMJE Criteria for Authorship                                                                                                                                                                                         | Contributions for the Acknowledgment Section                                                                                         |
|-----------------------------------------------------------------------------------------------------------------------------------------------------------------------------------------------------------------------|--------------------------------------------------------------------------------------------------------------------------------------|
| <input type="checkbox"/> Substantial contribution to concept and design, acquisition of data, or analyses and interpretations                                                                                         | <input checked="" type="checkbox"/> Copyediting/proofreading, e.g. grammatical assistance, stylistic suggestions to outline or draft |
| <input type="checkbox"/> Drafting the article or revising it critically for important intellectual content                                                                                                            | <input checked="" type="checkbox"/> Editorial assistance, e.g. preparing references, fact-checking, labeling illustrations or tables |
| <input type="checkbox"/> Final approval of version to be published                                                                                                                                                    | <input checked="" type="checkbox"/> Production assistance, e.g. assembling tables, graphs, figures, photos or other illustrations    |
| <input type="checkbox"/> Agreement to be accountable for all aspects of the work in ensuring that questions related to the accuracy or integrity of any part of the work are appropriately investigated and resolved. |                                                                                                                                      |

**Do you have any financial relationships to report?**  
 Yes  No

If yes, please provide relevant information in table below.

**Types of financial relationships and the companies with whom we (I and/or my spouse/life partner) have relationships are as follows:**

| Check boxes              | Type of financial relationship WITHIN THE PAST 12 MONTHS ONLY                                              | Indicate applicable commercial interest(s) WITHIN THE PAST 12 MONTHS ONLY | Compensated ✓            | Uncompensated ✓          |
|--------------------------|------------------------------------------------------------------------------------------------------------|---------------------------------------------------------------------------|--------------------------|--------------------------|
| <input type="checkbox"/> | Employment/leadership position                                                                             |                                                                           | <input type="checkbox"/> | <input type="checkbox"/> |
| <input type="checkbox"/> | Intellectual property rights/Inventor or patent holder                                                     |                                                                           | <input type="checkbox"/> | <input type="checkbox"/> |
| <input type="checkbox"/> | Consultant/Advisory role                                                                                   |                                                                           | <input type="checkbox"/> | <input type="checkbox"/> |
| <input type="checkbox"/> | Honoraria received directly from commercial interest or their agents (e.g., speakers' bureaus)             |                                                                           | <input type="checkbox"/> | <input type="checkbox"/> |
| <input type="checkbox"/> | Research funding/Contracted research (including funds paid to your institution)                            |                                                                           | <input type="checkbox"/> | <input type="checkbox"/> |
| <input type="checkbox"/> | Ownership interest (stocks, stock options, or other ownership interest excluding diversified mutual funds) |                                                                           | <input type="checkbox"/> | <input type="checkbox"/> |
| <input type="checkbox"/> | Expert testimony                                                                                           |                                                                           | <input type="checkbox"/> | <input type="checkbox"/> |
| <input type="checkbox"/> | Other (including any reimbursed or sponsored travel)                                                       |                                                                           | <input type="checkbox"/> | <input type="checkbox"/> |

If you reported relationships in the chart above, will you nonetheless be able to provide an unbiased article?  Yes  No

By signing below, I represent that the foregoing information is complete and truthful. I will notify the editorial office if there are any changes in my financial relationships prior to the publication of this article.

Signature of Reporting Individual

11 Jan 2018  
 Date of Submission
